# Supplementary material
Source: PubMed Central journal article supplement (PMC2760105)
Supplement: emboj2009227s2.pdf [file emboj2009227s2.pdf]

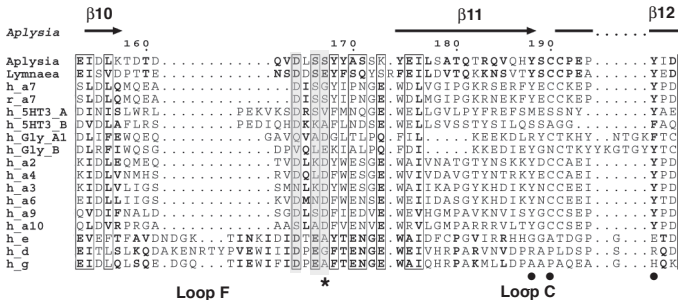

**Supplementary Fig 1:** Sequence variability within the LGIC family members. Partial sequence alignment of loops F and C in A-AChBP with those in L-AChBP and the LBD of selected human Cys-loop receptors. Residues within loop F that interact with the BA derivatives and tropisetron (via a water molecule) are shown with a gray background. Residues within loop C that interact with the BA derivatives and tropisetron are indicated with a filled circle. Asterisk denotes the position of a key residue in the sequence of rat  $\alpha 7$  to confer DMXBA selectivity. Figure is drawn with ESPript (Gouet et al., 1999)
